# Supplementary material
Source: publisher figshare collection journal article supplement (https://sage.figshare.com/ndownloader/files/20718237)
Supplement: Supplementary file 1 [file 20718237]

**Supplementary Figure 3. List of questions explored during in-depth interviews with refugees**

Opening question: Can you tell me about your life in Lebanon?

1. **Exploring the Syrians’ perceived sources of distress and support**

- Can you describe the main problems you are facing in Lebanon?
- How do you usually deal with these problems?

1. **Exploring the Syrians’ explanations of and attitudes towards mental health problems** (Kleinman & Benson, 2006)

- Do you feel you suffer from a mental health problem? Can you describe it?
- What do you call this problem?
- What do you believe is the cause of this problem?
- What course do you expect it to take and how does it affect your body and mind?

1. **Exploring the Syrians’ experiences with MHPSS services**

- How did you access the mental health service?
- Can you describe what type of interventions was provided for you?
- What do you think of these interventions?
- What do you feel would be beneficial for your wellbeing?
